# Supplementary material for: Organoboron compounds constructed through the tautomerization of 1H-indole to 3H-indole for red OLEDs
Source: Royal Society of Chemistry journal article supplement (doi:10.1039/d1tc01537k), 2021-01-01
Supplement: d1tc01537k1.pdf [file d1tc01537k1.pdf]

## Electronic Supplementary Information

### **Organoboron compounds constructed through tautomerization of 1*H*-indole to 3*H*-indole for red OLEDs**

Guoqi Xia, Cheng Qu, Yunlong Zhu, Kaiqi Ye, Zuolun Zhang\* and Yue Wang

State Key Laboratory of Supramolecular Structure and Materials, College of Chemistry, Jilin University, Changchun 130012, P. R. China

#### **Contents**

|                                                              |            |
|--------------------------------------------------------------|------------|
| <b>1. General information</b>                                | <b>S2</b>  |
| <b>2. Theoretical calculations</b>                           | <b>S2</b>  |
| <b>3. Single-crystal X-ray diffraction</b>                   | <b>S2</b>  |
| <b>4. Device fabrications</b>                                | <b>S3</b>  |
| <b>5. Syntheses</b>                                          | <b>S3</b>  |
| <b>6. Supplementary figures</b>                              | <b>S5</b>  |
| <b>7. Supplementary tables</b>                               | <b>S10</b> |
| <b>8. References</b>                                         | <b>S11</b> |
| <b>9. NMR spectra</b>                                        | <b>S12</b> |
| <b>10. Crystallographic data</b>                             | <b>S16</b> |
| <b>11. Cartesian coordinates of DFT-optimized geometries</b> | <b>S17</b> |

## 1. General information

1-Bromo-3,6-di-*tert*-butyl-9*H*-carbazole<sup>[1]</sup> and 2-bromo-4-(*tert*-butyl)-*N*-(4-(*tert*-butyl)phenyl)aniline<sup>[2]</sup> were synthesized according to literature procedures. Toluene for synthesis was dried and distilled. Other chemicals for organic syntheses were obtained from commercial sources and used as received. All synthetic reactions were carried out by using Schlenk techniques under a nitrogen atmosphere. <sup>1</sup>H- and <sup>13</sup>C{<sup>1</sup>H}-NMR spectra were recorded on a Varian Mercury 400 MHz spectrometer (400 MHz for <sup>1</sup>H and 100 MHz for <sup>13</sup>C) with tetramethylsilane as the internal standard. Mass spectra were measured on a Thermo Fisher ITQ 1100 mass spectrometer. Elemental analyses were done on an elemental Vario micro cube analyser. TGA measurements were performed on a TA Q500 thermogravimeter at a heating rate of 10 °C min<sup>-1</sup> under nitrogen. DSC measurements were performed on a NETZSCH DSC204 instrument at a heating rate of 10 °C min<sup>-1</sup> under a nitrogen atmosphere. UV-visible absorption spectra were collected on a Shimadzu UV-2550 spectrophotometer. Emission spectra were recorded on a Shimadzu RF-5301 PC spectrometer. The absolute fluorescence quantum yields of solutions and doped films, as well as fluorescence lifetimes, were measured on an Edinburgh FLS920 spectrometer. Electrochemical measurements were performed with a BAS 100W Bioanalytical electrochemical work station, using a platinum disk as the working electrode, a platinum wire as the counter electrode, and an Ag/Ag<sup>+</sup> electrode as the reference electrode. A 0.1 M solution of *n*-Bu<sub>4</sub>NPF<sub>6</sub> in dry CH<sub>2</sub>Cl<sub>2</sub> (for oxidation) or THF (for reduction) was used as the supporting electrolyte. The scan rate of the electrochemical measurements was 100 mV s<sup>-1</sup>.

## 2. Theoretical calculations

DFT and TD-DFT calculations were performed using Gaussian 09 program<sup>[3]</sup> at the B3LYP/6-31G(d,p)<sup>[4]</sup> level of theory. The molecular structures in single crystals were used as the input for optimizing ground-state geometries of the compounds. Based on these optimized structures, the gas-phase vertical transitions were calculated.

## 3. Single-crystal X-ray diffraction

Diffraction data were collected on a Rigaku RAXIS-PRID diffractometer using the  $\omega$ -scan mode with graphite-monochromator Mo•K $\alpha$  radiation. The structure was solved with direct methods using the SHELXTL programs and refined with full-matrix least-squares on  $F^2$ .<sup>[5]</sup> Non-hydrogen atoms were refined anisotropically. The positions of

hydrogen atoms were calculated and refined isotropically. The structures were deposited at the CCDC under the following numbers: 1893122 (for **1**) and 1893121 (for **2**).

#### 4. Device fabrication

HATCN, NPB, TCTA, 3P-T2T and LiF were electronic grade and obtained from commercial sources. **1** and **2** were purified by vacuum sublimation before device fabrication. Commercial ITO-coated glass was used as the starting substrate. Before device fabrication, the ITO glass was pre-cleaned carefully and treated by UV/O<sub>3</sub> for 5 min. The devices were prepared in vacuum at a pressure of  $5 \times 10^{-4}$  Pa. After the deposition of organic layers, LiF and aluminum were thermally evaporated onto the organic surface. The thicknesses of the organic materials and the cathode layers were monitored using a quartz-crystal thickness monitor. The electrical characteristics of the OLEDs devices were measured with a Keithley 2400 sourcemeter. The EL spectra and luminance of the OLED devices were obtained on a PR655 spectrometer. All measurements were carried out on the devices without encapsulations in ambient atmosphere under dark.

#### 5. Syntheses

**3,6-Di-*tert*-butyl-1-(1*H*-indol-2-yl)-9*H*-carbazole (IDBC).** Water (65 mL) and THF (130 mL) were added to a mixture of 1-bromo-3,6-di-*tert*-butyl-9*H*-carbazole (7.8 g, 21.8 mmol), (1*H*-indol-2-yl)boronic acid pinacol ester (5.0 g, 20.7 mmol), Pd(PPh<sub>3</sub>)<sub>4</sub> (1.2 g, 1.1 mmol) and K<sub>2</sub>CO<sub>3</sub> (18.0 g, 130.2 mmol) at r.t. After heated at 60 °C for 13 h, the reaction mixture was extracted by CH<sub>2</sub>Cl<sub>2</sub> for three times. The collected organic phase was dried with anhydrous Na<sub>2</sub>SO<sub>4</sub> and then filtered. After removal of the solvent under reduced pressure, the residue was purified by silica-gel column chromatography (CH<sub>2</sub>Cl<sub>2</sub> : petroleum ether = 2 : 3) to provide the product as a white solid (6.1 g, 71%). <sup>1</sup>H-NMR (400 MHz, CD<sub>2</sub>Cl<sub>2</sub>, ppm): δ 8.59 (s, 1H), 8.53 (s, 1H), 8.15 (s, 2H), 7.71 (d, *J* = 7.9 Hz, 1H), 7.67 (s, 1H), 7.60 – 7.47 (m, 2H), 7.43 (d, *J* = 8.5 Hz, 1H), 7.25 (t, *J* = 7.6 Hz, 1H), 7.18 (t, *J* = 7.5 Hz, 1H), 6.96 (s, 1H), 1.52 (s, 9H), 1.47 (s, 9H). <sup>13</sup>C{<sup>1</sup>H}-NMR (100 MHz, DMSO-*d*<sub>6</sub>, ppm): δ 141.26, 141.22, 138.86, 136.63, 135.68, 134.85, 128.87, 123.80, 123.33, 122.40, 121.41, 121.09, 119.83, 119.23, 115.95, 115.81, 115.44, 111.20, 100.52, 34.60, 34.42, 31.91. MS (ESI, *m/z*): 394.1 [M]<sup>+</sup> (calcd: 394.2). Elem. Anal. Calcd (%) for C<sub>28</sub>H<sub>30</sub>N<sub>2</sub>: C, 85.24; H, 7.66; N, 7.10. Found: C, 85.87; H, 7.91; N, 7.00.

**Compound 1.** A solution of BPh<sub>3</sub> (2.0 g, 8.3 mmol) in toluene (50 mL) was added to a solution of IDBC (3.1 g, 7.8 mmol) in toluene (30 mL) at r.t. The resulting mixture was gradually heated to 100 °C and stirred at this temperature for 24 h. After removal of the solvent

on rotavapor, the residue was purified by silica-gel column chromatography (CH<sub>2</sub>Cl<sub>2</sub> : petroleum ether = 1 : 2) to provide compound **1** as a red solid (1.7 g, 39%). <sup>1</sup>H-NMR (400 MHz, CD<sub>2</sub>Cl<sub>2</sub>, ppm): δ 8.42 (s, 1H), 8.10 (s, 1H), 7.78 (s, 1H), 7.57–7.53 (m, 5H), 7.25–7.11 (m, 10H), 6.86 (d, *J* = 8.7 Hz, 1H), 4.64 (s, 2H), 1.52 (s, 9H), 1.38 (s, 9H). <sup>13</sup>C{<sup>1</sup>H}-NMR (100 MHz, CD<sub>2</sub>Cl<sub>2</sub>, ppm): δ 174.16, 149.38, 143.55, 142.41, 141.81, 141.46, 134.27, 133.07, 128.03, 127.78, 126.80, 126.48, 126.27, 125.15, 124.57, 124.42, 124.18, 121.64, 120.32, 117.01, 114.17, 109.99, 38.48, 35.20, 34.88, 32.10, 32.07. MS (ESI, *m/z*): 558.0 [M]<sup>+</sup> (calcd: 558.3). Elem. Anal. Calcd (%) for C<sub>40</sub>H<sub>39</sub>BN<sub>2</sub>: C, 86.01; H, 7.04; N, 5.02. Found: C, 86.39; H, 7.38; N, 4.84.

**4-(*Tert*-butyl)-*N*-(4-(*tert*-butyl)phenyl)-2-(1*H*-indol-2-yl)aniline (IDBA).** IDBA was synthesized and purified using the methods described for IDBC, with the starting material 1-bromo-3,6-di-*tert*-butyl-9*H*-carbazole replaced by 2-bromo-4-(*tert*-butyl)-*N*-(4-(*tert*-butyl)phenyl)aniline. The compound was obtained as a white solid in a yield of 60%. <sup>1</sup>H-NMR (400 MHz, DMSO-*d*<sub>6</sub>, ppm): δ 11.30 (s, 1H), 7.60 (s, 1H), 7.50 (d, *J* = 7.8 Hz, 1H), 7.41 (d, *J* = 8.1 Hz, 1H), 7.26–7.18 (m, 5H), 7.08 (t, *J* = 7.0 Hz, 1H), 7.00–6.91 (m, 3H), 6.76 (s, 1H), 1.34 (s, 9H), 1.24 (s, 9H). <sup>13</sup>C{<sup>1</sup>H}-NMR (100 MHz, DMSO-*d*<sub>6</sub>, ppm): δ 144.04, 142.33, 141.31, 138.29, 136.41, 135.87, 128.53, 126.15, 125.69, 125.09, 123.95, 121.15, 120.31, 129.87, 119.06, 116.14, 111.19, 100.98, 34.07, 33.71, 31.38, 31.27. MS (ESI, *m/z*): 396.1 [M]<sup>+</sup> (calcd: 396.3). Elem. Anal. Calcd (%) for C<sub>28</sub>H<sub>32</sub>N<sub>2</sub>: C, 84.80; H, 8.13; N, 7.06. Found: C, 84.62; H, 8.48; N, 6.79.

**Compound 2.** Compound **2** was synthesized and purified using the methods described for compound **1**, with the starting material IDBC replaced by IDBA. The compound was obtained as a red solid in a yield of 34%. <sup>1</sup>H-NMR (400 MHz, CD<sub>2</sub>Cl<sub>2</sub>, ppm): δ 7.46 (d, *J* = 7.5 Hz, 1H), 7.44–7.41, (m, 4H), 7.31 (d, *J* = 2.4 Hz, 1H), 7.23 (dd, *J* = 9.2, 2.4 Hz, 1H), 7.13–7.07 (m, 7H), 7.03 (d, *J* = 8.6 Hz, 2H), 6.99 (t, *J* = 7.5 Hz, 1H), 6.71 (d, *J* = 8.1 Hz, 1H), 6.61 (d, *J* = 8.5 Hz, 2H), 6.39 (d, *J* = 9.2 Hz, 1H), 4.40 (s, 2H), 1.29 (s, 9H), 1.20 (s, 9H). <sup>13</sup>C{<sup>1</sup>H}-NMR (100 MHz, CD<sub>2</sub>Cl<sub>2</sub>, ppm): δ 171.55, 151.94, 149.37, 147.87, 143.55, 137.62, 135.37, 134.97, 132.72, 129.08, 127.61, 127.01, 126.01, 125.56, 125.49, 124.85, 124.10, 119.51, 117.85, 111.32, 38.78, 34.50, 34.03, 31.47, 31.09. MS (ESI, *m/z*): 559.9 [M]<sup>+</sup> (calcd: 560.3). Elem. Anal. Calcd (%) for C<sub>40</sub>H<sub>41</sub>BN<sub>2</sub>: C, 85.70; H, 7.37; N, 5.00. Found: C, 85.58; H, 7.57; N, 4.90.

## 6. Supplementary figures

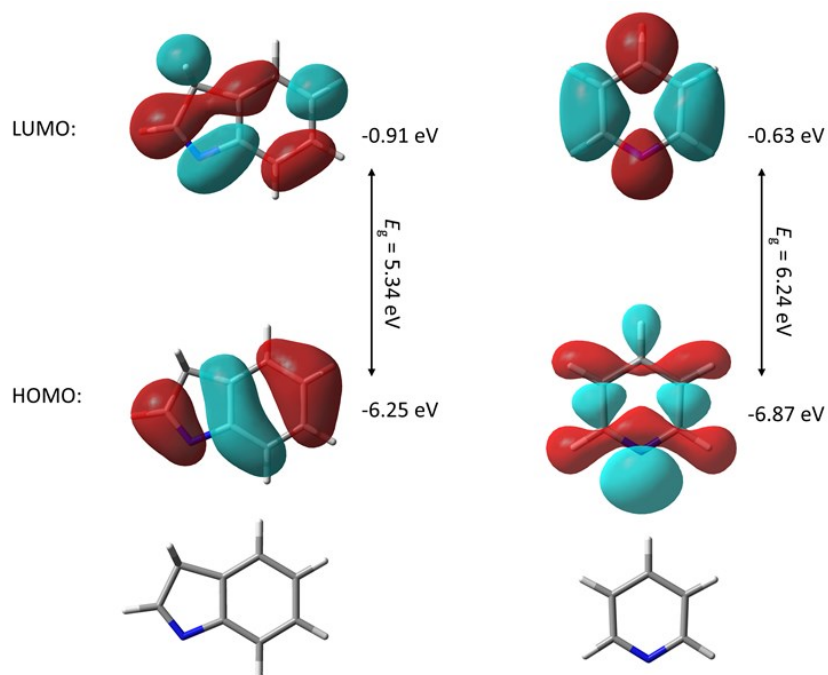

**Fig. S1** DFT-calculated frontier molecular orbital distributions and energy levels of 3*H*-indole (left) and pyridine (right).

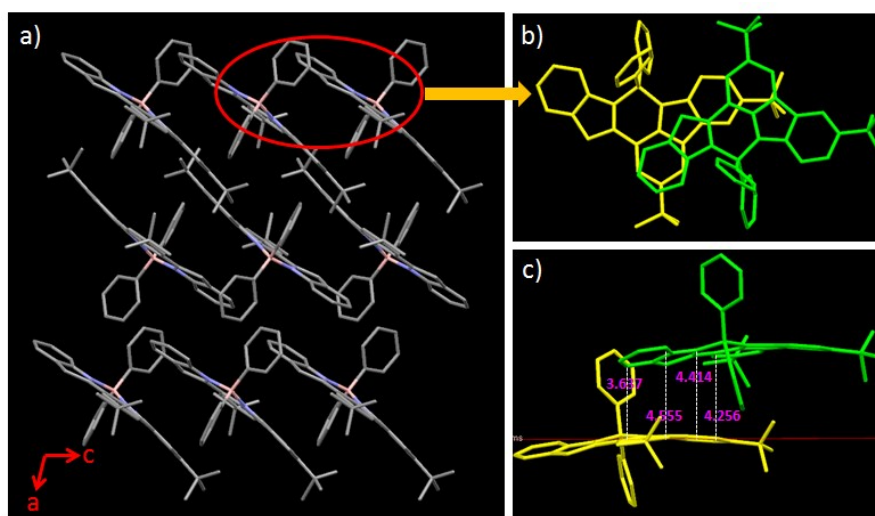

**Fig. S2** Molecular packing structure of **1** in the single crystal (solvent molecules and hydrogen atoms are omitted for clarity): a) view along the *b* axis; b) arrangements of neighboring molecules viewed perpendicular to the mean plane of the carbazole moiety; c) distance between the mean plane of the carbazole moiety and the neighboring  $\pi$ -system.

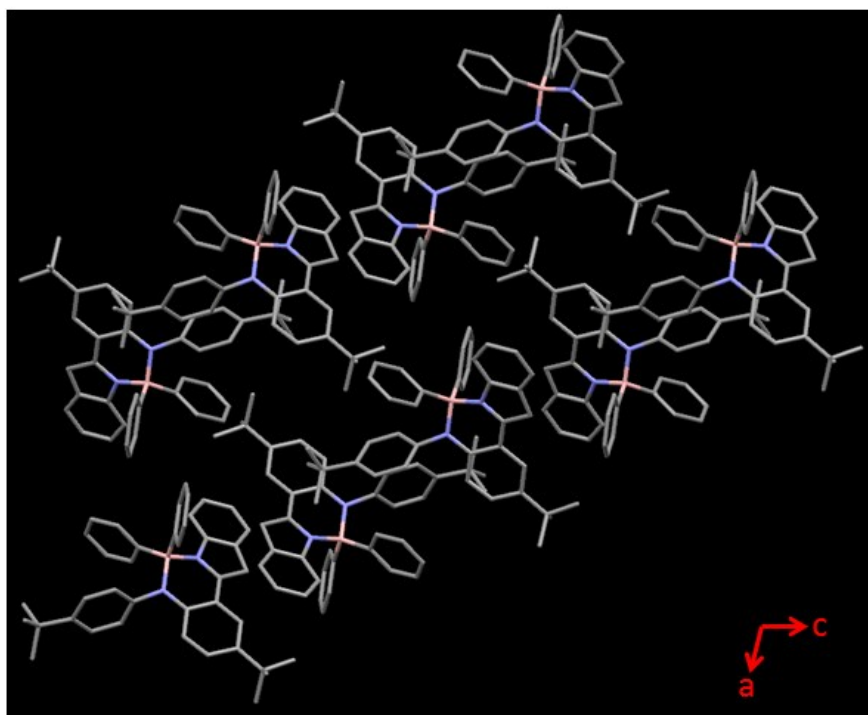

**Fig. S3** Molecular packing structure of **2** in the single crystal viewed along the *b* axis (hydrogen atoms are omitted for clarity).

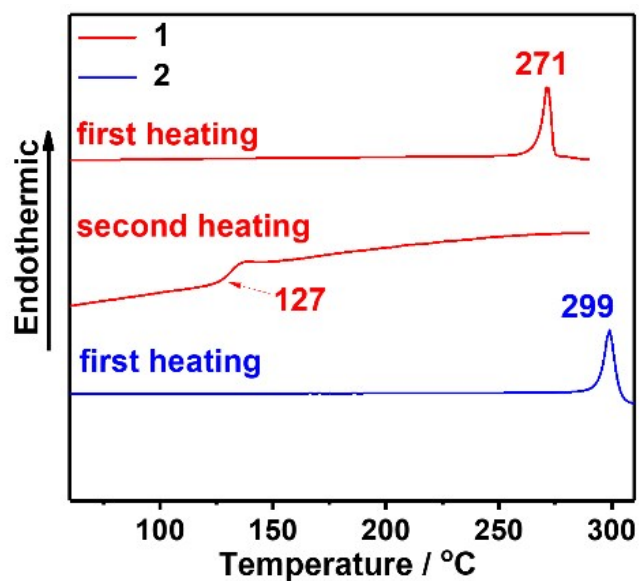

**Fig. S4** DSC curves of **1** and **2**.

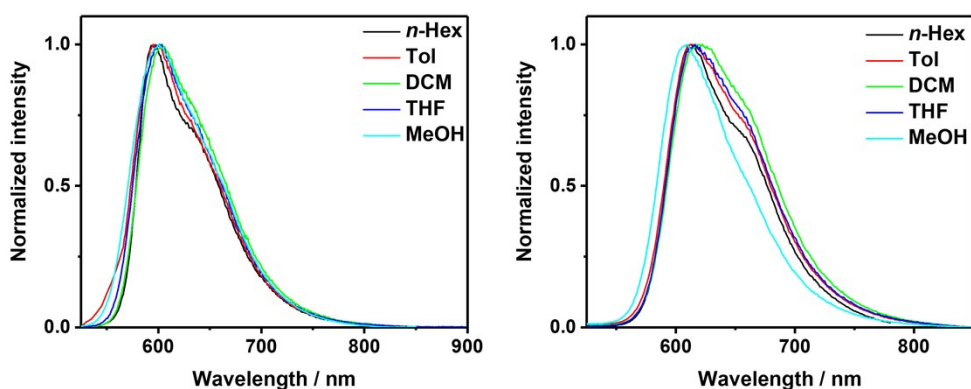

**Fig. S5** Luminescence solvatochromism of **1** (left) and **2** (right).

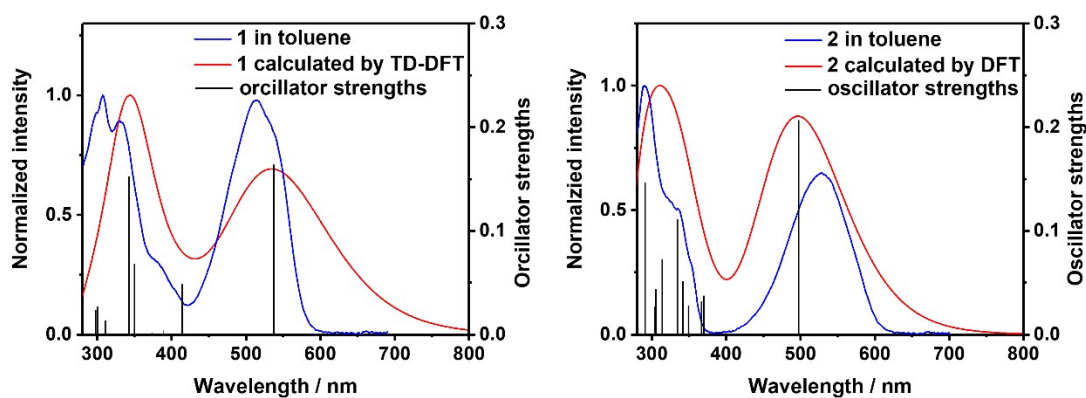

| Compound | Transition           | $E / \text{eV}$ | $\lambda / \text{nm}$ | Dominant components          |
|----------|----------------------|-----------------|-----------------------|------------------------------|
| <b>1</b> | $S_1 \leftarrow S_0$ | 2.31            | 537                   | LUMO $\leftarrow$ HOMO (99%) |
| <b>2</b> | $S_1 \leftarrow S_0$ | 2.50            | 497                   | LUMO $\leftarrow$ HOMO (99%) |

**Fig. S6** Comparison between the calculated (10 singlet states) and experimental absorption spectra and of **1** (left) and **2** (right), as well as the calculated photophysical data of these compounds.

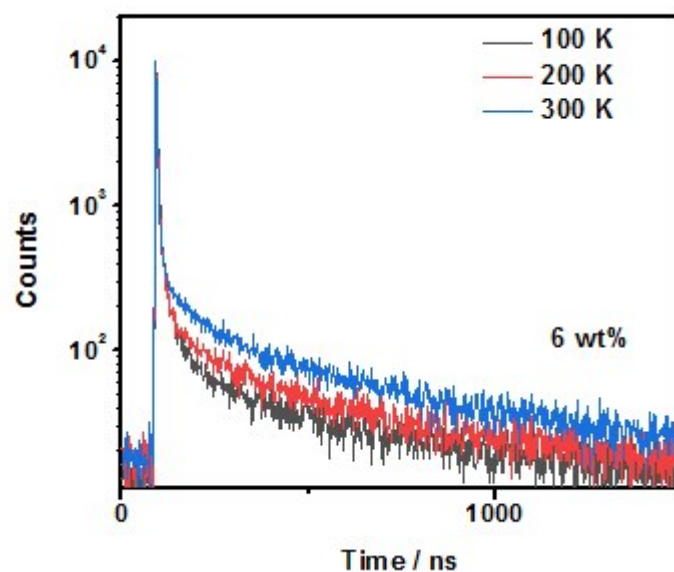

**Fig. S7** Temperature-dependent fluorescence decay curves of the doped film with 6 wt% concentration.

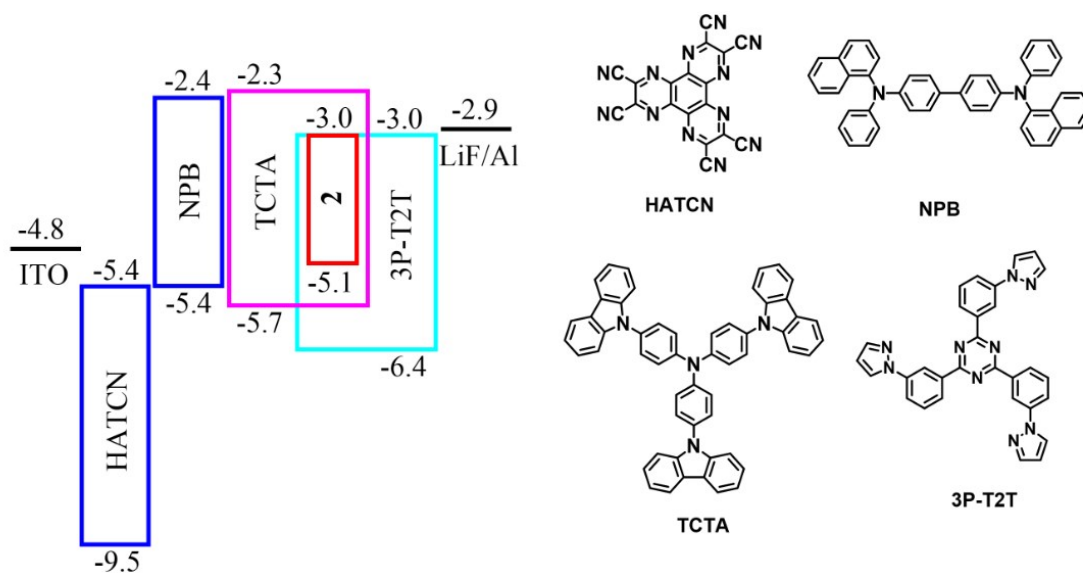

**Fig. S8** Structures and energy levels (eV) of the materials adopted in the OLEDs.



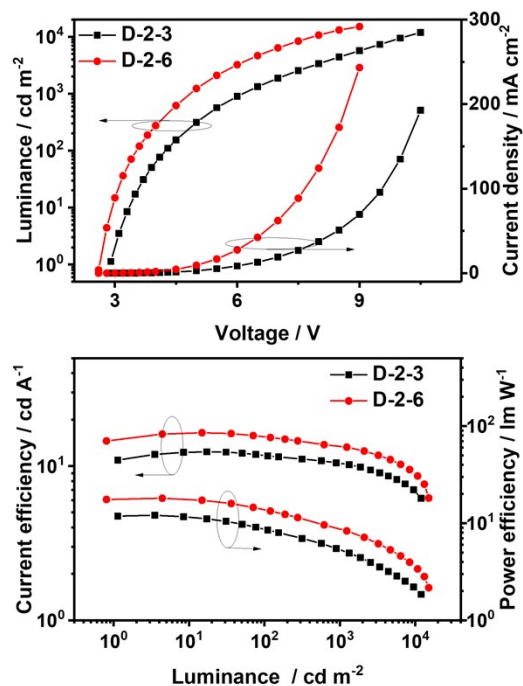

**Fig. S9** Current density-voltage-luminance characteristics and the current and power efficiency vs. luminance characteristics of the OLED devices.

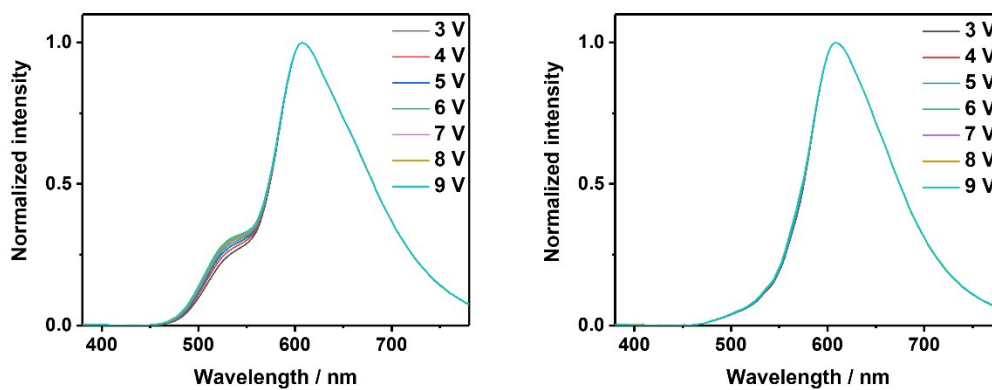

**Fig. S10** Electroluminescent spectra of D-2-3 (left) and D-2-6 (right) under a variety of driving voltages.

## 7. Supplementary tables

**Table S1** Summary of the photophysical data of the toluene solutions and doped films of the compounds.

|                             | $\lambda_{\text{abs}} / \text{nm}$ | $\lambda_{\text{PL}} / \text{nm}$ | PLQY | Lifetime / ns |         |
|-----------------------------|------------------------------------|-----------------------------------|------|---------------|---------|
|                             |                                    |                                   |      | Prompt        | Delayed |
| <b>1</b> in toluene         | 514                                | 595                               | 0.40 | ---           | ---     |
| <b>2</b> in toluene         | 528                                | 611                               | 0.31 | ---           | ---     |
| <b>2</b> in co-host (3 wt%) | ---                                | 604                               | 0.56 | 15            | 343     |
| <b>2</b> in co-host (6 wt%) | ---                                | 616                               | 0.64 | 11            | 229     |

**Table S2** Comparison between the performances of exciplex-hosted red fluorescent OLEDs reported in literatures and in this work.

| Emitting layer                                    | Device performance                          |                                 |                           |           |
|---------------------------------------------------|---------------------------------------------|---------------------------------|---------------------------|-----------|
|                                                   | $\text{EQE}_{\text{max}/100/1000}^a$<br>[%] | $\lambda_{\text{EL}}^b$<br>[nm] | CIE coordinates<br>(x, y) | Ref.      |
| TCTA:3P-T2T:6 wt% <b>2</b>                        | 10.2/9.4/8.0                                | 612                             | (0.620, 0.371)            | This work |
| TCTA:3P-T2T:0.5 wt% DCJTB                         | 7.48/---/7.32                               | 586                             | ---                       |           |
| TCTA:3P-T2T:1 wt% DCJTB                           | 10.15/---/10.03                             | 605                             | ---                       | 6         |
| TCTA:3P-T2T:1.5 wt% DCJTB                         | 5.63/---/5.13                               | 610                             | ---                       |           |
| TrisPCz:CN-T2T:1 wt% DCJTB                        | 9.7/---/9.1                                 | ---                             | (0.59, 0.40)              | 7         |
| TCTA:B4PYMPM:4CzIPN:0.5 wt% DCJTB <sup>c</sup>    | 12.9/12.4/10.1                              | ---                             | (0.58, 0.41)              |           |
| TCTA:B4PYMPM:4CzPN:0.5 wt% DCJTB <sup>c</sup>     | 12.3/11.9/9.9                               | ---                             | (0.58, 0.41)              |           |
| TCTA:B4PYMPM:4CzTPN:0.5 wt% DCJTB <sup>c</sup>    | 8.4/8.0/6.4                                 | ---                             | (0.56, 0.43)              | 8         |
| TCTA:B4PYMPM:4CzTPN-Ph:0.5 wt% DCJTB <sup>c</sup> | 7.5/7.14/5.8                                | ---                             | (0.59, 0.41)              |           |
| TCTA:B4PYMPM:0.5 wt% DCJTB                        | 7.3/7.1/6.0                                 | ---                             | (0.59, 0.41)              |           |
| TCTA:B4PYMPM: 0.5 wt% DCJTB                       | 10.6/ ---/ ---                              | 600                             | ---                       | 9         |
| TAPC: 1 wt% DBP/TAPC (3 nm)/TmPyTZ                | 14.5/---/---                                | 602                             | (0.527, 0.460)            |           |
| TAPC: 1 wt% DBP/mCP (2 nm)/TmPyTZ                 | 14.9/---/---                                | 602                             | (0.560, 0.429)            | 10        |
| TAPC: 1%DCJTB/mCP (3 nm)/TmPyTZ                   | 10.4/---/---                                | 584                             | ---                       |           |

<sup>a</sup> The maximum EQE and EQEs at 100 and 1000 cd m<sup>-2</sup>. <sup>b</sup> The EL peak. <sup>c</sup>A sensitizer with thermally-activated delayed fluorescence was adopted for improving device performance.

## 8. References

- [1] P. Pandit, K. Yamamoto, T. Nakamura, K. Nishimura, Y. Kurashige, T. Yanai, G. Nakamura, S. Masaoka, K. Furukawa, Y. Yakiyama, M. Kawano and S. Higashibayashi, *Chem. Sci.*, 2015, **6**, 4160.
- [2] V. A. Golubev, and V. D. Sen', *Russ. J. Org. Chem.*, 2013, **49**, 1143.
- [3] Gaussian 09, Revision B.01, M. J. Frisch, G. W. Trucks, H. B. Schlegel, G. E. Scuseria, M. A. Robb, J. R. Cheeseman, G. Scalmani, V. Barone, B. Mennucci, G. A. Petersson, H. Nakatsuji, M. Caricato, X. Li, H. P. Hratchian, A. F. Izmaylov, J. Bloino, G. Zheng, J. L. Sonnenberg, M. Hada, M. Ehara, K. Toyota, R. Fukuda, J. Hasegawa, M. Ishida, T. Nakajima, Y. Honda, O. Kitao, H. Nakai, T. Vreven, J. A. Montgomery, Jr., J. E. Peralta, F. Ogliaro, M. Bearpark, J. J. Heyd, E. Brothers, K. N. Kudin, V. N. Staroverov, T. Keith, R. Kobayashi, J. Normand, K. Raghavachari, A. Rendell, J. C. Burant, S. S. Iyengar, J. Tomasi, M. Cossi, N. Rega, J. M. Millam, M. Klene, J. E. Knox, J. B. Cross, V. Bakken, C. Adamo, J. Jaramillo, R. Gomperts, R. E. Stratmann, O. Yazyev, A. J. Austin, R. Cammi, C. Pomelli, J. W. Ochterski, R. L. Martin, K. Morokuma, V. G. Zakrzewski, G. A. Voth, P. Salvador, J. J. Dannenberg, S. Dapprich, A. D. Daniels, O. Farkas, J. B. Foresman, J. V. Ortiz, J. Cioslowski, and D. J. Fox, Gaussian, Inc., Wallingford CT, 2010.
- [4] (a) G. A. Petersson, A. Bennett, T. G. Tensfeldt, M. A. Al-Laham, W. A. Shirley, J. Mantzaris, *J. Chem. Phys.*, 1988, **89**, 2193; (b) G. A. Petersson, M. A. Al-Laham, *J. Chem. Phys.*, 1991, **94**, 6081; (c) A. D. Becke, *J. Chem. Phys.*, 1993, **98**, 5648.
- [5] G. M. Sheldrick, *SHELXS-97, Program for Crystal Structure Solution*, University of Göttingen, Göttingen, 1997.
- [6] B. Zhao, T. Zhang, B. Chu, W. Li, Z. Su, H. Wu, X. Yan, F. Jin, Y. Gao and C. Liu, *Sci. Rep.*, 2015, **5**, 10697.
- [7] W.-Y. Hung, P.-Y. Chiang, S.-W. Lin, W.-C. Tang, Y.-T. Chen, S.-H. Liu, P.-T. Chou, Y.-T. Hung and K.-T. Wong, *ACS Appl. Mater. Interfaces*, 2016, **8**, 4811.
- [8] D. Li, Y. Hu and L.-S. Liao, *J. Mater. Chem. C*, 2019, **7**, 977.
- [9] K.-H. Kim, C.-K. Moon, J. W. Sun, B. Sim and J.-J. Kim, *Adv. Opt. Mater.*, 2015, **3**, 895.
- [10] B. B. Li, L. Gan, X. Y. Cai, X. L. Li, Z. H. Wang, K. Gao, D. C. Chen, Y. Cao and S. J. Su, *Adv. Mater. Interfaces*, 2018, **5**, 1800025.

## 9. NMR spectra

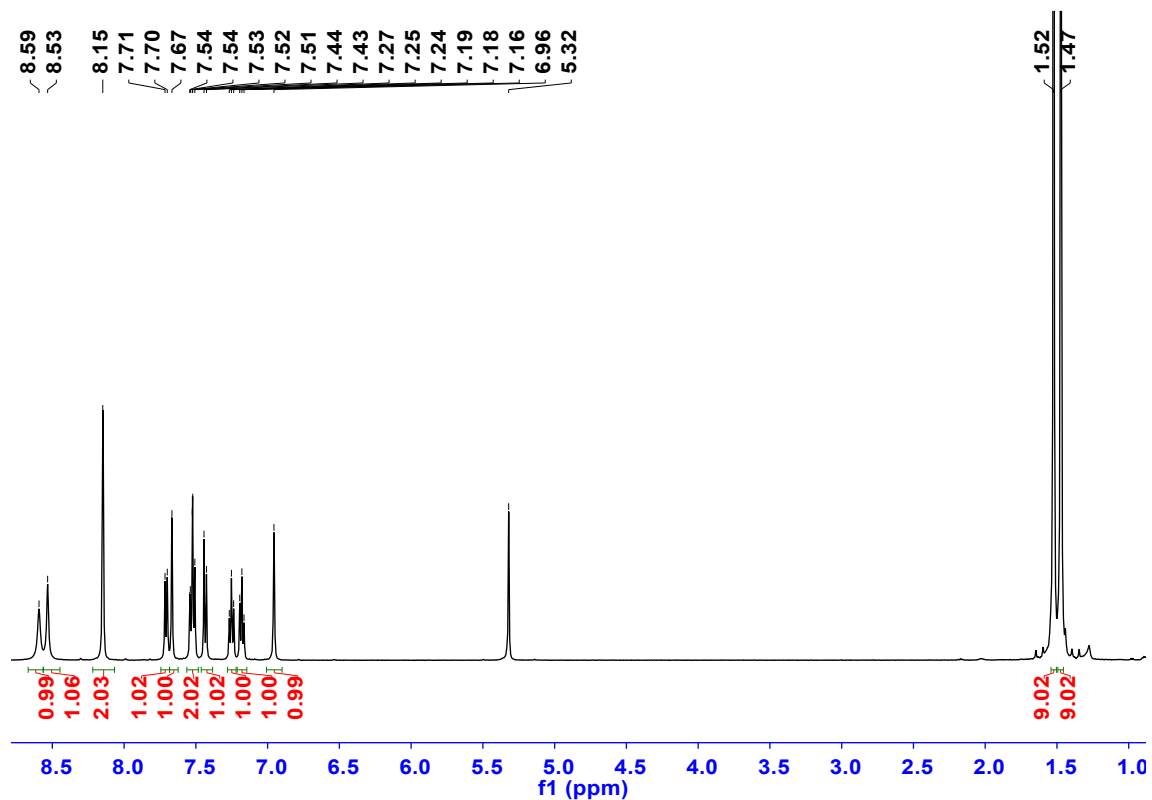

<sup>1</sup>H-NMR spectrum of IDBC in CD<sub>2</sub>Cl<sub>2</sub> at 400 MHz.

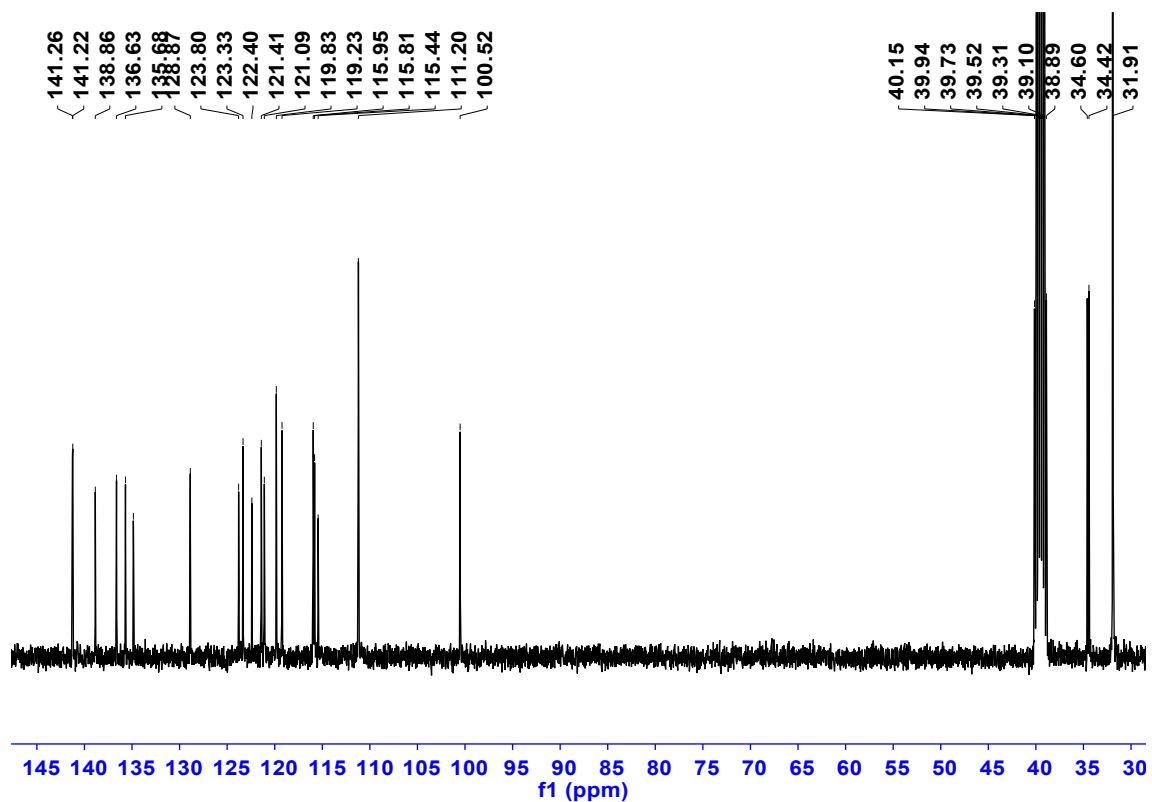

<sup>13</sup>C{<sup>1</sup>H}-NMR spectrum of IDBC in DMSO-*d*<sub>6</sub> at 100 MHz.

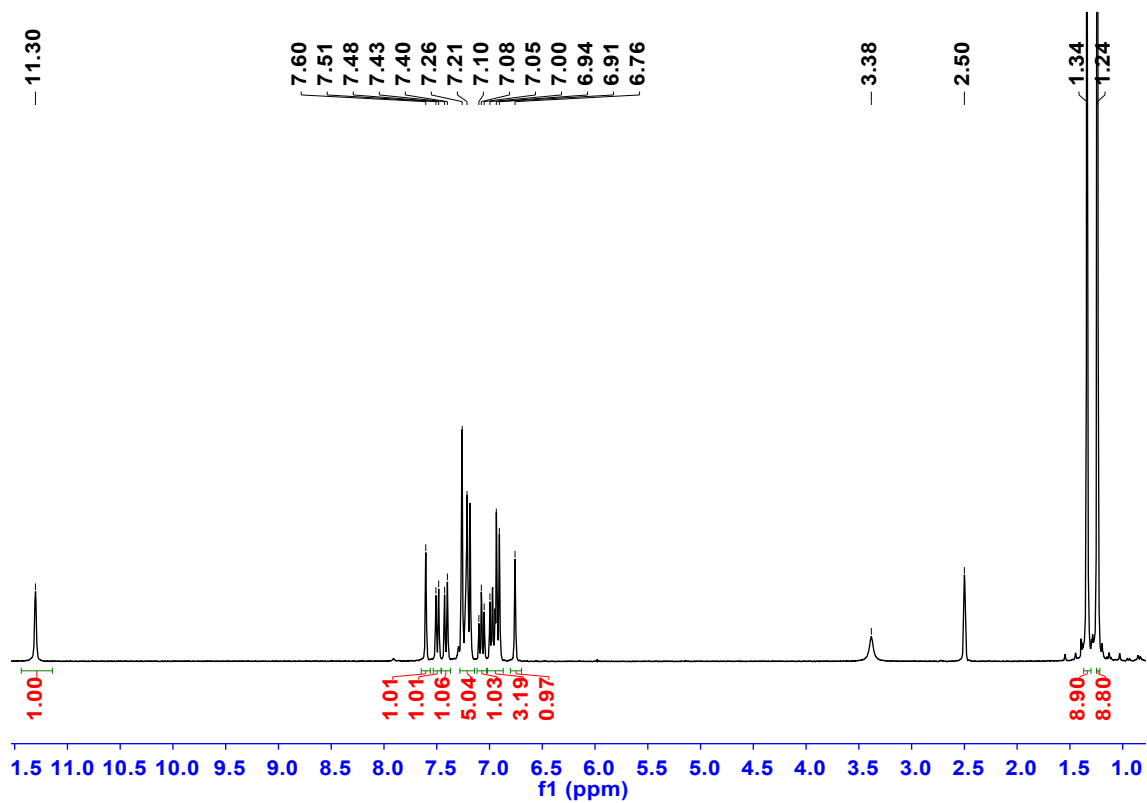

$^1\text{H}$ -NMR spectrum of **IDBA** in  $\text{DMSO-}d_6$  at 400 MHz.

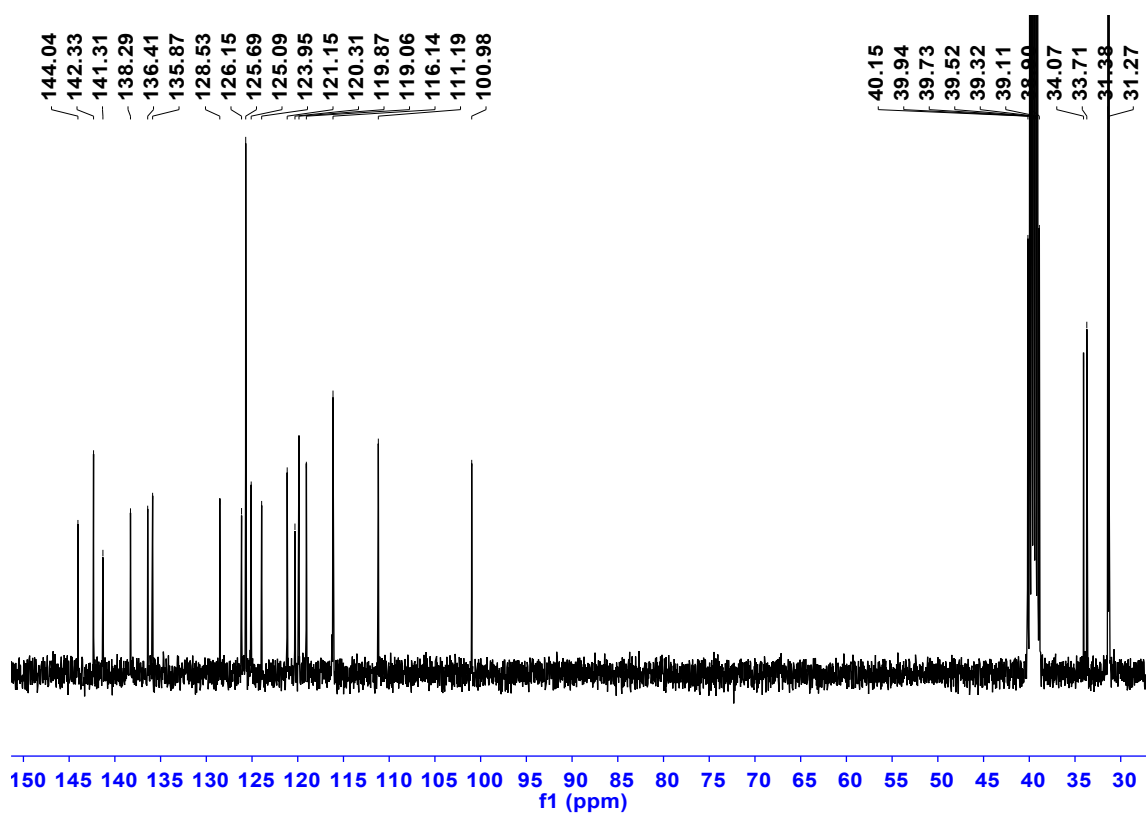

$^{13}\text{C}\{^1\text{H}\}$ -NMR spectrum of **IDBA** in  $\text{DMSO-}d_6$  at 100 MHz.

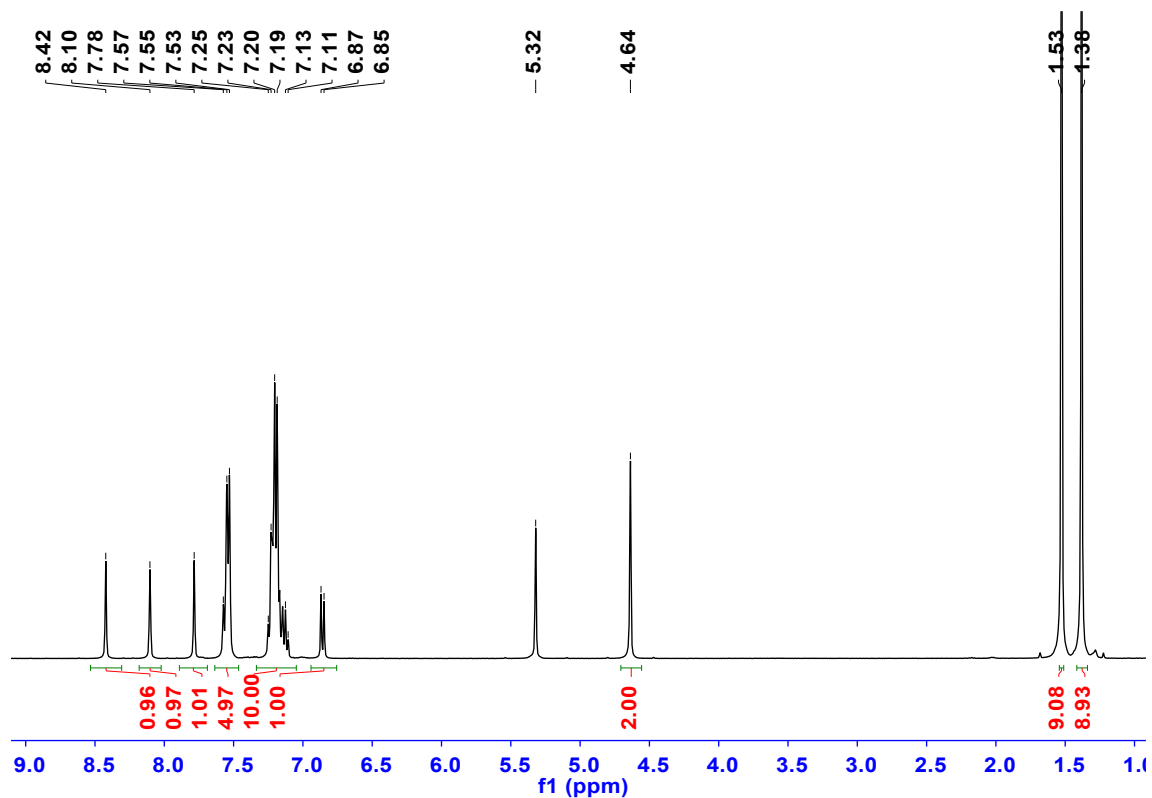

$^1\text{H}$ -NMR spectrum of **1** in  $\text{CD}_2\text{Cl}_2$  at 400 MHz.

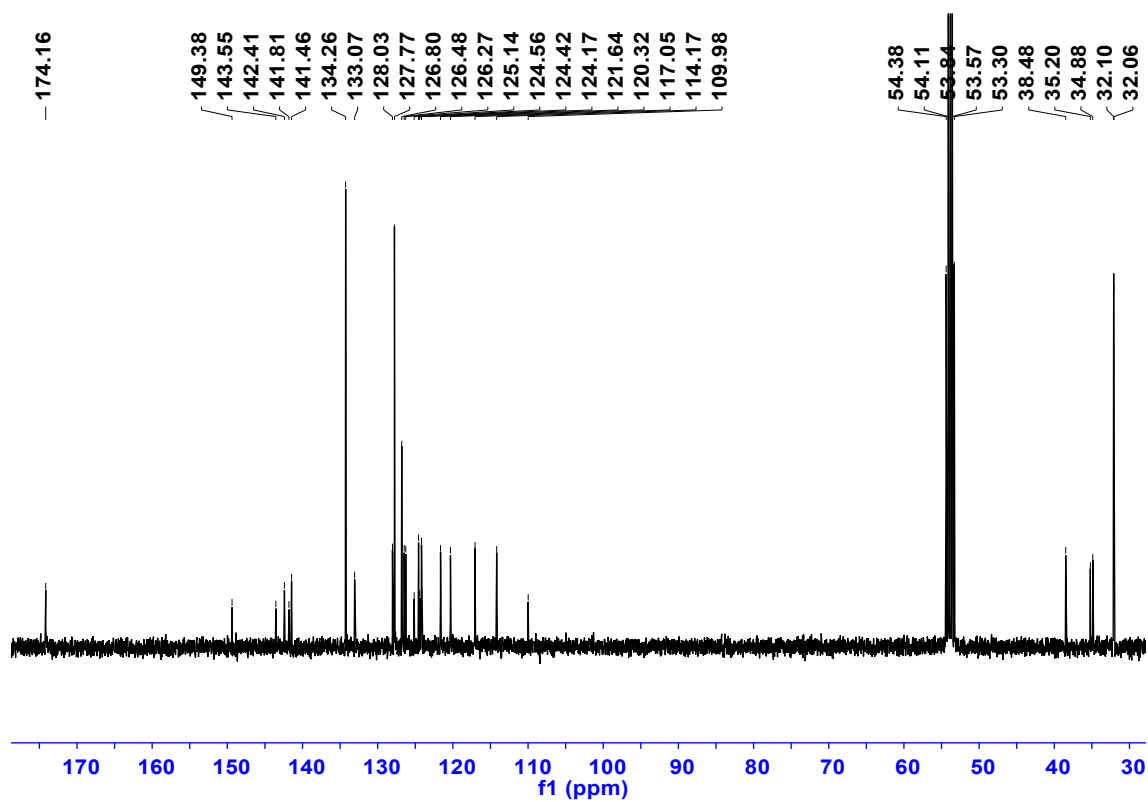

$^{13}\text{C}\{^1\text{H}\}$ -NMR spectrum of **1** in  $\text{CD}_2\text{Cl}_2$  at 100 MHz.

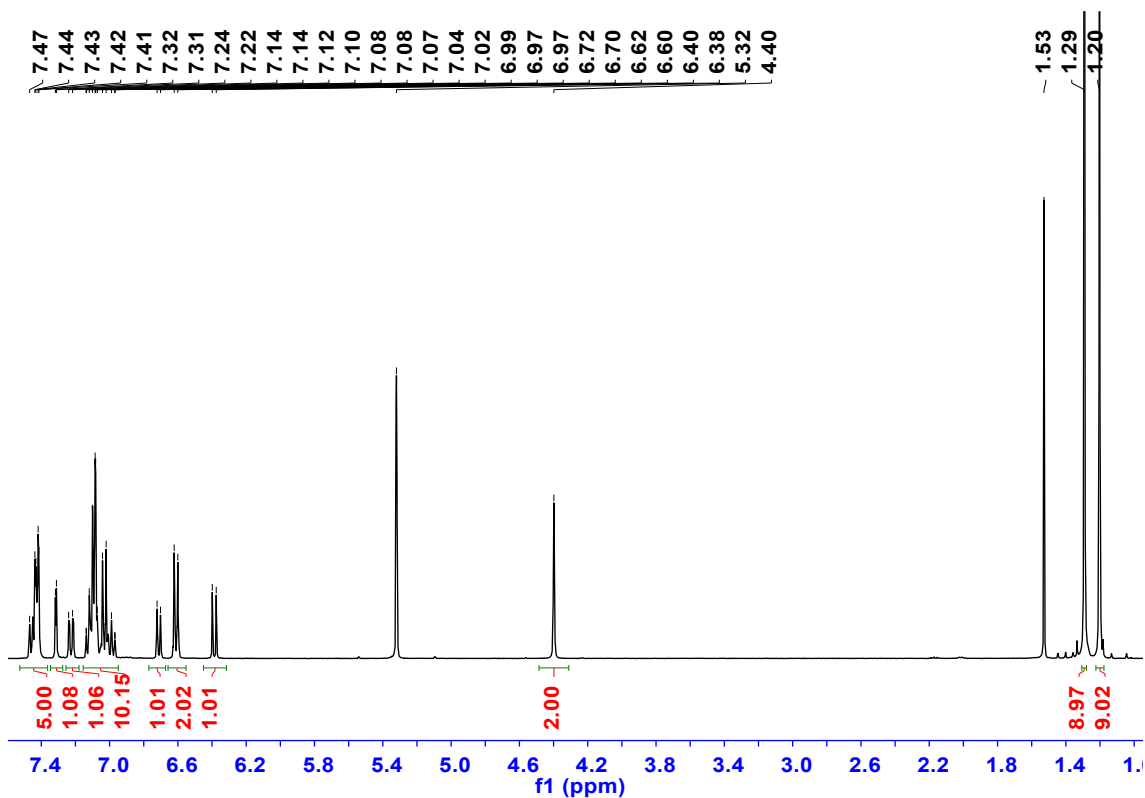

$^1\text{H-NMR}$  spectrum of **2** in  $\text{CD}_2\text{Cl}_2$  at 400 MHz.

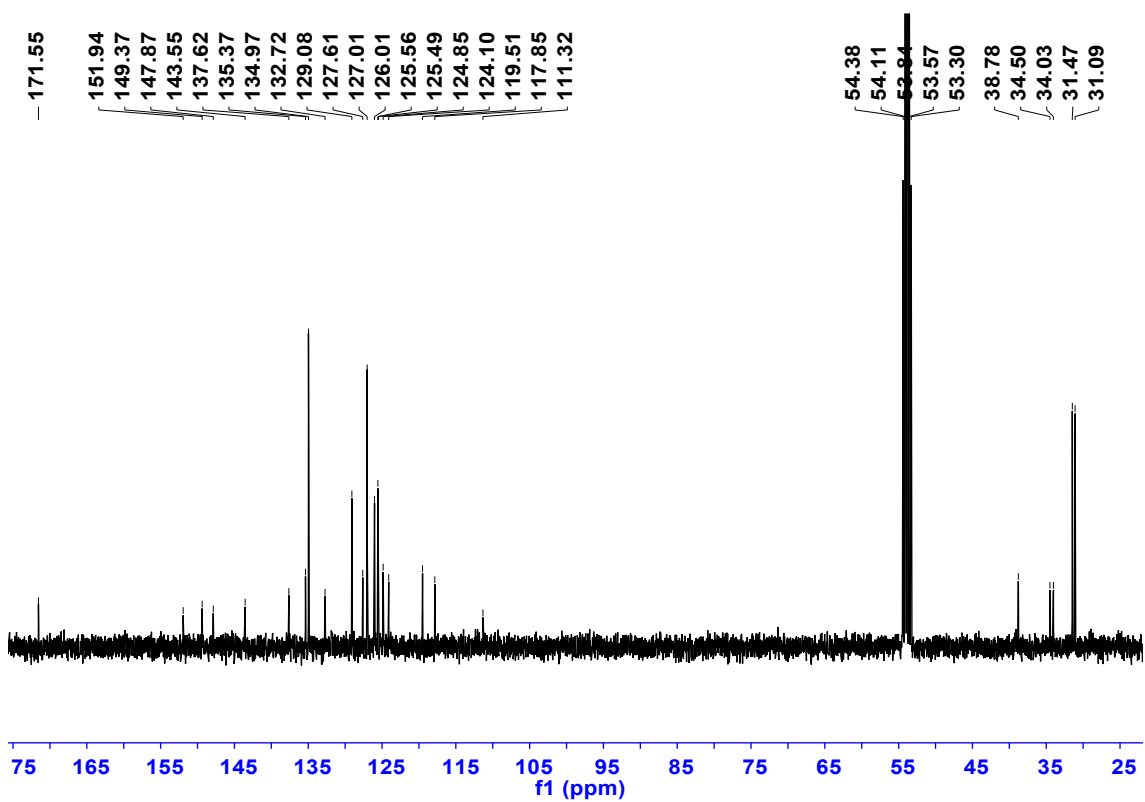

$^{13}\text{C}\{^1\text{H}\}$ -NMR spectrum of **2** in  $\text{CD}_2\text{Cl}_2$  at 100 MHz.

## 10. Crystallographic data

|                                 | <b>1</b>                                                                                           | <b>2</b>                                                                                       |
|---------------------------------|----------------------------------------------------------------------------------------------------|------------------------------------------------------------------------------------------------|
| Empirical formula               | C <sub>46</sub> H <sub>51</sub> B N <sub>2</sub>                                                   | C <sub>40</sub> H <sub>41</sub> B N <sub>2</sub>                                               |
| Formula weight                  | 642.70                                                                                             | 560.56                                                                                         |
| Temperature                     | 273.15 K                                                                                           | 153(2) K                                                                                       |
| Wavelength                      | 0.71073 Å                                                                                          | 0.71073 Å                                                                                      |
| Crystal system                  | Monoclinic                                                                                         | Monoclinic                                                                                     |
| Space group                     | P 1 21/c 1                                                                                         | P2 <sub>1</sub> /n                                                                             |
| Unit cell dimensions            | a = 16.3673(10) Å<br>b = 17.2125(11) Å<br>c = 13.2993(7) Å<br>α = 90°<br>β = 95.620(2)°<br>γ = 90° | a = 14.356(3) Å<br>b = 10.988(2) Å<br>c = 21.124(4) Å<br>α = 90°<br>β = 106.05(3)°<br>γ = 90°. |
| Volume                          | 3728.7(4) Å <sup>3</sup>                                                                           | 3202.3(12) Å <sup>3</sup>                                                                      |
| Z                               | 4                                                                                                  | 4                                                                                              |
| Density (calculated)            | 1.145 Mg/m <sup>3</sup>                                                                            | 1.163 Mg/m <sup>3</sup>                                                                        |
| Absorption coefficient          | 0.065 mm <sup>-1</sup>                                                                             | 0.066 mm <sup>-1</sup>                                                                         |
| F(000)                          | 1384                                                                                               | 1200                                                                                           |
| Theta range for data collection | 2.767 to 24.999°.                                                                                  | 3.078 to 24.999°.                                                                              |
| Index ranges                    | -19 ≤ h ≤ 19, -20 ≤ k ≤ 20, -<br>15 ≤ l ≤ 13                                                       | -16 ≤ h ≤ 16, -11 ≤ k ≤ 12, -<br>24 ≤ l ≤ 25                                                   |
| Reflections collected           | 44600                                                                                              | 14607                                                                                          |
| Independent reflections         | 6551 [R(int) = 0.0908]                                                                             | 4710 [R(int) = 0.0596]                                                                         |



|                                         |                                    |                                    |
|-----------------------------------------|------------------------------------|------------------------------------|
| Completeness to $\theta = 24.999^\circ$ | 99.6 %                             | 125.6 %                            |
| Absorption correction                   | Semi-empirical from<br>equivalents | None                               |
| Refinement method                       | Full-matrix least-squares on $F^2$ | Full-matrix least-squares on $F^2$ |
| Data / restraints / parameters          | 6551 / 183 / 468                   | 4710 / 0 / 394                     |
| Goodness-of-fit on $F^2$                | 1.086                              | 1.035                              |
| Final R indices [ $I > 2\sigma(I)$ ]    | R1 = 0.0992, wR2 = 0.2684          | R1 = 0.0573, wR2 = 0.1276          |
| R indices (all data)                    | R1 = 0.1740, wR2 = 0.3304          | R1 = 0.1100, wR2 = 0.1444          |

## 11. Cartesian coordinates of DFT-optimized geometries

1 optimized by DFT at the B3LYP/6-31G(d,p) level of theory.

---

| Symbol | Coordinates (Angstroms) |           |           |
|--------|-------------------------|-----------|-----------|
|        | X                       | Y         | Z         |
| B1     | -1.289712               | -0.891362 | 0.189729  |
| C1     | -1.510678               | -1.153896 | 1.785898  |
| C2     | -2.453111               | -0.463259 | 2.568801  |
| H1     | -3.102278               | 0.275859  | 2.108151  |
| C3     | -2.595551               | -0.689207 | 3.940472  |
| H2     | -3.339534               | -0.131813 | 4.504276  |
| C4     | -1.786621               | -1.623397 | 4.584211  |
| H3     | -1.892060               | -1.802857 | 5.650700  |
| C5     | -0.836463               | -2.323662 | 3.838981  |
| H4     | -0.192825               | -3.052857 | 4.324570  |
| C6     | -0.707363               | -2.090216 | 2.469710  |
| H5     | 0.047765                | -2.647173 | 1.923628  |
| C7     | -1.541373               | -2.165511 | -0.791077 |
| C8     | -1.956946               | -3.428805 | -0.334339 |
| H6     | -2.131054               | -3.577282 | 0.727759  |
| C9     | -2.153000               | -4.501397 | -1.209835 |
| H7     | -2.471890               | -5.465350 | -0.821350 |
| C10    | -1.940266               | -4.335887 | -2.578382 |
| H8     | -2.092022               | -5.166567 | -3.262302 |
| C11    | -1.527117               | -3.092122 | -3.060974 |
| H9     | -1.355046               | -2.951539 | -4.125089 |
| C12    | -1.330595               | -2.031724 | -2.176611 |
| H10    | -0.996481               | -1.074475 | -2.571378 |
| C13    | -3.679937               | 0.226872  | -0.508635 |
| C14    | -4.478526               | -0.914791 | -0.518385 |
| H11    | -4.061972               | -1.895539 | -0.338376 |
| C15    | -5.841924               | -0.748309 | -0.777940 |

|     |           |           |           |
|-----|-----------|-----------|-----------|
| H12 | -6.483414 | -1.624022 | -0.793401 |
| C16 | -6.391994 | 0.514061  | -1.015869 |
| H13 | -7.454505 | 0.611756  | -1.215685 |
| C17 | -5.581183 | 1.654469  | -0.993442 |
| H14 | -6.005698 | 2.638600  | -1.170434 |
| C18 | -4.226672 | 1.499416  | -0.737572 |
| C19 | -3.113828 | 2.501906  | -0.626617 |
| H15 | -2.943528 | 3.072871  | -1.547377 |
| H16 | -3.270997 | 3.235112  | 0.174865  |
| C20 | -1.929551 | 1.620533  | -0.313441 |
| C21 | -0.582435 | 2.047616  | -0.149434 |
| C22 | -0.142721 | 3.391535  | -0.165610 |
| H17 | -0.889487 | 4.175439  | -0.209792 |
| C23 | 2.167458  | 2.676098  | -0.108311 |
| H18 | 3.226191  | 2.919577  | -0.105696 |
| C24 | 1.778343  | 1.344636  | -0.098306 |
| C25 | 0.390760  | 1.036378  | -0.084656 |
| C26 | 1.411691  | -0.923074 | -0.122153 |
| C27 | 2.444195  | 0.057231  | -0.120470 |
| C28 | 3.785390  | -0.327088 | -0.155818 |
| H19 | 4.556260  | 0.438605  | -0.151559 |
| C29 | 3.092978  | -2.629930 | -0.213432 |
| H20 | 3.330532  | -3.686150 | -0.259333 |
| C30 | 1.743842  | -2.277204 | -0.177601 |
| H21 | 0.977997  | -3.042115 | -0.213153 |
| C31 | 1.212071  | 3.726057  | -0.128316 |
| C32 | 1.704724  | 5.186495  | -0.122540 |
| C33 | 0.542764  | 6.196845  | -0.146606 |
| H22 | -0.068092 | 6.094367  | -1.049794 |
| H23 | -0.109976 | 6.087675  | 0.725836  |
| H24 | 0.940647  | 7.216351  | -0.134094 |
| C34 | 2.536254  | 5.445048  | 1.156619  |
| H25 | 2.903420  | 6.477486  | 1.172036  |
| H26 | 1.931500  | 5.285342  | 2.055116  |

|     |           |           |           |
|-----|-----------|-----------|-----------|
| H27 | 3.405528  | 4.783982  | 1.219534  |
| C35 | 2.587123  | 5.443301  | -1.367364 |
| H28 | 2.019498  | 5.281543  | -2.289566 |
| H29 | 2.953197  | 6.476213  | -1.369908 |
| H30 | 3.459775  | 4.784121  | -1.394360 |
| C36 | 4.137161  | -1.681933 | -0.199609 |
| C37 | 5.625049  | -2.083967 | -0.236676 |
| C38 | 6.334513  | -1.557946 | 1.033583  |
| H31 | 7.396944  | -1.827701 | 1.019963  |
| H32 | 6.268936  | -0.468807 | 1.113993  |
| H33 | 5.886367  | -1.985438 | 1.936398  |
| C39 | 5.819769  | -3.610853 | -0.293509 |
| H34 | 5.366302  | -4.046610 | -1.189681 |
| H35 | 6.888827  | -3.846190 | -0.317444 |
| H36 | 5.392657  | -4.108983 | 0.582886  |
| C40 | 6.296878  | -1.469375 | -1.487689 |
| H37 | 5.820938  | -1.832068 | -2.404570 |
| H38 | 6.231812  | -0.377213 | -1.489334 |
| H39 | 7.358596  | -1.739169 | -1.525140 |
| N1  | -2.277638 | 0.338614  | -0.257240 |
| N2  | 0.152939  | -0.298304 | -0.083027 |

**2** optimized by DFT at the B3LYP/6-31G(d,p) level of theory.

---

| Coordinates (Angstroms) |           |          |           |
|-------------------------|-----------|----------|-----------|
| Symbol                  | X         | Y        | Z         |
| B1                      | 0.149442  | 1.162977 | 0.391307  |
| C1                      | 2.119502  | 2.581269 | -0.919134 |
| C2                      | 2.376427  | 0.365426 | -0.637885 |
| C3                      | -0.986501 | 2.172069 | -0.186688 |
| C4                      | 3.404503  | 2.318150 | -1.419582 |
| C5                      | 3.665577  | 0.847288 | -1.264633 |
| H1                      | 3.862437  | 0.334510 | -2.213345 |

|      |           |           |           |
|------|-----------|-----------|-----------|
| H2   | 4.518594  | 0.635514  | -0.607000 |
| C6   | 0.541317  | 1.351332  | 1.966926  |
| C7   | 3.042903  | -1.997518 | -0.415196 |
| H3   | 4.060227  | -1.687644 | -0.622436 |
| C8   | 3.432253  | -5.446077 | -1.438088 |
| H4   | 4.164660  | -6.259383 | -1.493809 |
| H5   | 3.408799  | -4.942501 | -2.410080 |
| H6   | 2.449161  | -5.897183 | -1.273145 |
| C9   | -2.693717 | 3.907457  | 0.093236  |
| H7   | -3.243704 | 4.575117  | 0.751816  |
| C10  | 3.852961  | -5.209871 | 1.038931  |
| H8   | 4.124545  | -4.534120 | 1.856206  |
| H9   | 4.594674  | -6.015626 | 1.001789  |
| H10  | 2.887171  | -5.660468 | 1.286490  |
| C11  | 5.217207  | -3.907124 | -0.602073 |
| H11  | 5.553659  | -3.215334 | 0.177309  |
| H12  | 5.261293  | -3.387942 | -1.565463 |
| H13  | 5.934541  | -4.732943 | -0.641015 |
| C 12 | -6.699959 | -1.417970 | 0.858377  |
| H14  | -6.689896 | -0.335893 | 1.023931  |
| H15  | -6.343274 | -1.907152 | 1.770697  |
| H16  | -7.741730 | -1.719384 | 0.708487  |
| C13  | -5.969420 | -3.350119 | -0.549248 |
| H17  | -7.017322 | -3.649907 | -0.664343 |
| H18  | -5.560137 | -3.874371 | 0.320608  |
| H29  | -5.425519 | -3.695759 | -1.433286 |
| C14  | -6.463692 | -1.114627 | -1.611582 |
| H20  | -7.516806 | -1.392097 | -1.735158 |
| H21  | -5.937590 | -1.390268 | -2.530216 |
| H22  | -6.407351 | -0.026207 | -1.509414 |
| C15  | 0.690766  | -1.317245 | -0.045857 |
| C16  | 2.054407  | -0.982966 | -0.326557 |
| C17  | 2.755569  | -3.336880 | -0.239463 |
| C18  | -1.632012 | -0.710066 | -0.022988 |

|     |           |           |           |
|-----|-----------|-----------|-----------|
| C19 | -4.382692 | -1.419708 | -0.224179 |
| C20 | 1.600332  | 3.875563  | -0.917055 |
| H23 | 0.608979  | 4.085316  | -0.540724 |
| C21 | -2.525163 | -0.419202 | 1.010605  |
| H24 | -2.165906 | 0.082687  | 1.901537  |
| C22 | 0.442024  | 0.302182  | 2.899022  |
| H25 | 0.080351  | -0.667905 | 2.570718  |
| C23 | -1.722578 | 3.052125  | 0.623564  |
| H26 | -1.532614 | 3.072881  | 1.692790  |
| C24 | 1.028285  | 2.577646  | 2.465489  |
| H27 | 1.131293  | 3.426079  | 1.794429  |
| C25 | 3.807801  | -4.454685 | -0.310925 |
| C26 | -3.873653 | -0.766464 | 0.904640  |
| H28 | -4.527898 | -0.516662 | 1.731743  |
| C27 | 1.271570  | 1.686766  | 4.701495  |
| H29 | 1.548507  | 1.815448  | 5.744400  |
| C28 | -1.283721 | 2.184928  | -1.563252 |
| H30 | -0.743837 | 1.513159  | -2.227553 |
| C29 | 0.403006  | -2.702852 | 0.108099  |
| H31 | -0.612587 | -3.007077 | 0.327191  |
| C30 | 1.395673  | -3.653785 | 0.024269  |
| H32 | 1.114146  | -4.691055 | 0.182946  |
| C31 | 4.192929  | 3.339498  | -1.928534 |
| H33 | 5.187979  | 3.134980  | -2.313706 |
| C32 | 0.795443  | 0.460010  | 4.242181  |
| H34 | 0.700712  | -0.378757 | 4.927502  |
| C33 | 2.402580  | 4.898129  | -1.432915 |
| H35 | 2.015902  | 5.912642  | -1.442499 |
| C34 | 1.388296  | 2.748765  | 3.802528  |
| H36 | 1.757725  | 3.712672  | 4.143964  |
| C35 | -2.129193 | -1.354664 | -1.165708 |
| H37 | -1.454039 | -1.573051 | -1.987687 |
| C36 | 3.680788  | 4.641980  | -1.935032 |
| H38 | 4.280182  | 5.456014  | -2.330661 |

|     |           |           |           |
|-----|-----------|-----------|-----------|
| C37 | -5.862436 | -1.817013 | -0.371036 |
| C38 | -3.471185 | -1.705685 | -1.256038 |
| H39 | -3.815053 | -2.201234 | -2.159471 |
| C39 | -2.958741 | 3.902987  | -1.275668 |
| H40 | -3.711326 | 4.566942  | -1.692584 |
| C40 | -2.248269 | 3.032457  | -2.105921 |
| H41 | -2.447438 | 3.015988  | -3.174565 |
| N1  | -0.252749 | -0.335668 | 0.055072  |
| N2  | 1.530770  | 1.369391  | -0.447597 |
